# Supplementary material
Source: HighWire-hosted journal article supplement (https://hw-f5-jim.highwire.org/content/70/3/820)
Supplement: inline-supplementary-material-1 [file inline-supplementary-material-1.pdf]

**Critical Illness in Patients with Metastatic Cancer: a Population-Based Cohort Study of Epidemiology  
and Outcomes**

**Lavi Oud, MD**

**Supplementary File**

STROBE Statement—Checklist of items that should be included in reports of *cohort studies*

|                              | <b>Item<br/>No</b> | <b>Recommendation</b>                                                                                                                                                                                                 | <b>Page<br/>No</b> |
|------------------------------|--------------------|-----------------------------------------------------------------------------------------------------------------------------------------------------------------------------------------------------------------------|--------------------|
| <b>Title and abstract</b>    | 1                  | (a) Indicate the study's design with a commonly used term in the title or the abstract<br><br>(b) Provide in the abstract an informative and balanced summary of what was done and what was found                     | 1, 2               |
| <b>Introduction</b>          |                    |                                                                                                                                                                                                                       |                    |
| Background/rationale         | 2                  | Explain the scientific background and rationale for the investigation being reported                                                                                                                                  | 4-5                |
| Objectives                   | 3                  | State specific objectives, including any prespecified hypotheses                                                                                                                                                      | 5                  |
| <b>Methods</b>               |                    |                                                                                                                                                                                                                       |                    |
| Study design                 | 4                  | Present key elements of study design early in the paper                                                                                                                                                               | 5                  |
| Setting                      | 5                  | Describe the setting, locations, and relevant dates, including periods of recruitment, exposure, follow-up, and data collection                                                                                       | 5, 6               |
| Participants                 | 6                  | (a) Give the eligibility criteria, and the sources and methods of selection of participants. Describe methods of follow-up<br><br>(b) For matched studies, give matching criteria and number of exposed and unexposed | 5, 6               |
| Variables                    | 7                  | Clearly define all outcomes, exposures, predictors, potential confounders, and effect modifiers. Give diagnostic criteria, if applicable                                                                              | 6, 7               |
| Data sources/<br>measurement | 8                  | For each variable of interest, give sources of data and details of methods of assessment (measurement). Describe comparability of assessment methods if there is more than one group                                  | 6, 7               |
| Bias                         | 9                  | Describe any efforts to address potential sources of bias                                                                                                                                                             | 8, 9               |
| Study size                   | 10                 | Explain how the study size was arrived at                                                                                                                                                                             | NA                 |

|                        |    |                                                                                                                                                                                                                                                                                                                                        |        |
|------------------------|----|----------------------------------------------------------------------------------------------------------------------------------------------------------------------------------------------------------------------------------------------------------------------------------------------------------------------------------------|--------|
| Quantitative variables | 11 | Explain how quantitative variables were handled in the analyses. If applicable, describe which groupings were chosen and why                                                                                                                                                                                                           | 6-9    |
| Statistical methods    | 12 | (a) Describe all statistical methods, including those used to control for confounding<br><br>(b) Describe any methods used to examine subgroups and interactions<br><br>(c) Explain how missing data were addressed<br><br>(d) If applicable, explain how loss to follow-up was addressed<br><br>(e) Describe any sensitivity analyses | 7-9    |
| <b>Results</b>         |    |                                                                                                                                                                                                                                                                                                                                        |        |
| Participants           | 13 | (a) Report numbers of individuals at each stage of study—eg numbers potentially eligible, examined for eligibility, confirmed eligible, included in the study, completing follow-up, and analysed<br><br>(b) Give reasons for non-participation at each stage<br><br>(c) Consider use of a flow diagram                                | 10     |
| Descriptive data       | 14 | (a) Give characteristics of study participants (eg demographic, clinical, social) and information on exposures and potential confounders<br><br>(b) Indicate number of participants with missing data for each variable of interest<br><br>(c) Summarise follow-up time (eg, average and total amount)                                 | 10     |
| Outcome data           | 15 | Report numbers of outcome events or summary measures over time                                                                                                                                                                                                                                                                         | 10, 11 |

|                          |    |                                                                                                                                                                                                                                                                                                                                                                                                                       |       |
|--------------------------|----|-----------------------------------------------------------------------------------------------------------------------------------------------------------------------------------------------------------------------------------------------------------------------------------------------------------------------------------------------------------------------------------------------------------------------|-------|
| Main results             | 16 | (a) Give unadjusted estimates and, if applicable, confounder-adjusted estimates and their precision (eg, 95% confidence interval). Make clear which confounders were adjusted for and why they were included<br><br>(b) Report category boundaries when continuous variables were categorized<br><br>(c) If relevant, consider translating estimates of relative risk into absolute risk for a meaningful time period | 10-12 |
| Other analyses           | 17 | Report other analyses done—eg analyses of subgroups and interactions, and sensitivity analyses                                                                                                                                                                                                                                                                                                                        | 10-12 |
| <b>Discussion</b>        |    |                                                                                                                                                                                                                                                                                                                                                                                                                       |       |
| Key results              | 18 | Summarise key results with reference to study objectives                                                                                                                                                                                                                                                                                                                                                              | 13    |
| Limitations              | 19 | Discuss limitations of the study, taking into account sources of potential bias or imprecision. Discuss both direction and magnitude of any potential bias                                                                                                                                                                                                                                                            | 17    |
| Interpretation           | 20 | Give a cautious overall interpretation of results considering objectives, limitations, multiplicity of analyses, results from similar studies, and other relevant evidence                                                                                                                                                                                                                                            | 13-16 |
| Generalisability         | 21 | Discuss the generalisability (external validity) of the study results                                                                                                                                                                                                                                                                                                                                                 | 13-16 |
| <b>Other information</b> |    |                                                                                                                                                                                                                                                                                                                                                                                                                       |       |
| Funding                  | 22 | Give the source of funding and the role of the funders for the present study and, if applicable, for the original study on which the present article is based                                                                                                                                                                                                                                                         | NA    |

**eFigure 1. Plots of predicted vs observed values over time for the Deyo comorbidity index, number of organ failures, APR-DRG risk of death, and APR-DRG illness severity in critically ill patients with metastatic cancer**

Panel a: Deyo comorbidity index; panel b: number of organ failures; panel c: APR-DRG risk of death; panel d: APR-DRG illness severity. The maroon-colored markers and lines represent predicted mean values for each response variable on a given year and the regression line, respectively. The green round markers represent the corresponding observed mean values for each response variable on a given year. APR-DRG: All Patients Refined Diagnosis Related Groups

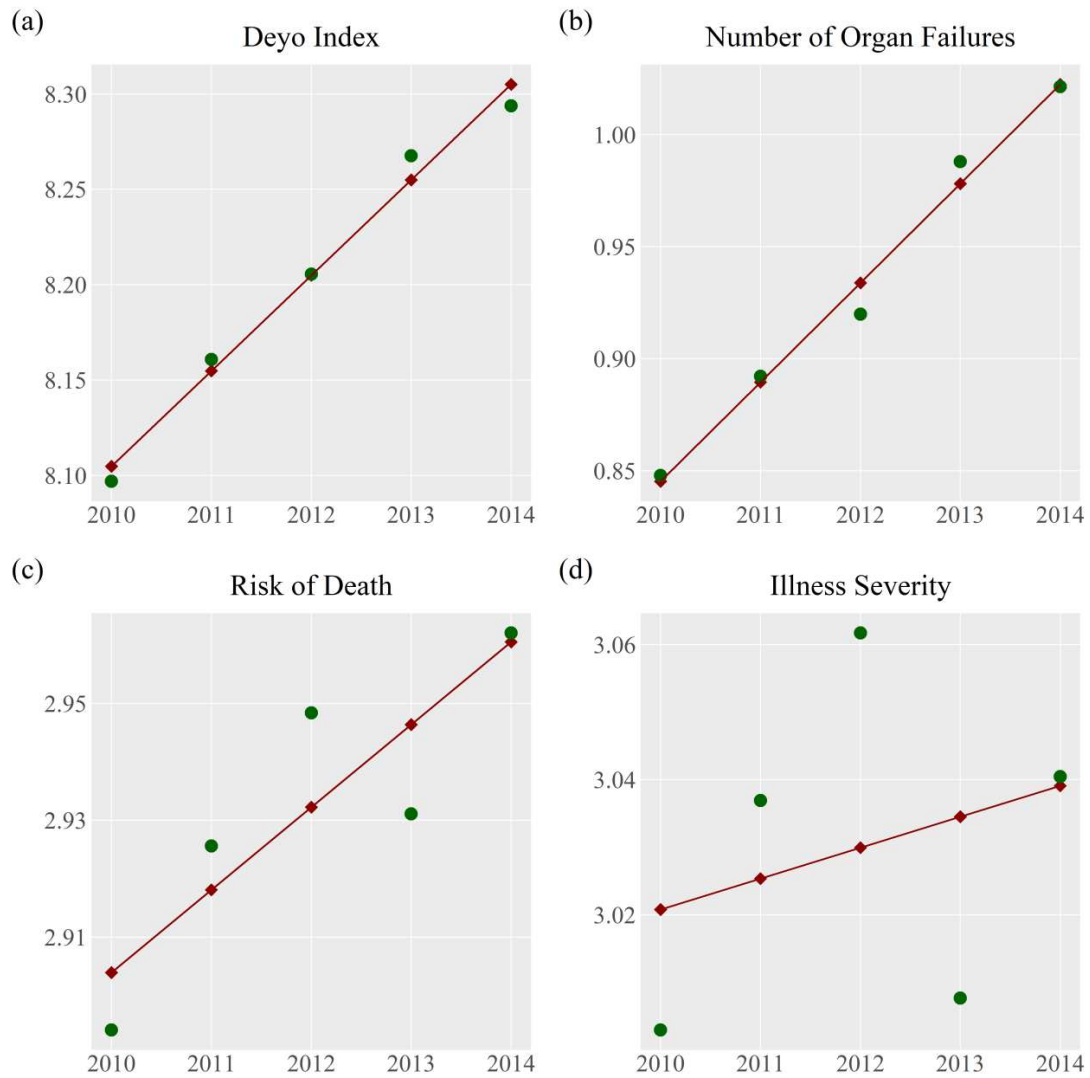

**eTable 1. Linear regression of the annual changes of the Deyo comorbidity**

**index, and the number of organ failures**

| Variable                 | coefficient (95% CI)      | p       |
|--------------------------|---------------------------|---------|
| Deyo comorbidity index   | +0.050 (+0.041 to +0.058) | <0.0001 |
| Number of organ failures | +0.044 (+0.040 to +0.048) | <0.0001 |

**eTable 2. Adjusted short-term mortality among ICU admissions with metastatic cancer, stratified by cancer type**

| Cancer type                       | Adjusted short-term mortality (95% CI) <sup>a</sup> |
|-----------------------------------|-----------------------------------------------------|
| Lung                              | 30.2 (29.9-30.5)                                    |
| Breast                            | 29.1 (28.5-29.6)                                    |
| Genitourinary                     | 27.9 (27.5-28.3)                                    |
| Colon                             | 25.5 (25.1-25.9)                                    |
| Other cancer or >1 cancer subtype | 27.2 (27.0-27.4)                                    |
| No identified type                | 31.9 (30.6-33.4)                                    |

<sup>a</sup> Adjusted short-term mortality is expressed as percent

**eTable 3. Adjusted short-term mortality among mechanically ventilated ICU admissions with metastatic cancer, stratified by cancer type**

| Cancer type                       | Adjusted short-term mortality (95% CI) <sup>a</sup> |
|-----------------------------------|-----------------------------------------------------|
| Lung                              | 62.8 (62.1-63.5)                                    |
| Breast                            | 65.6 (64.4-66.9)                                    |
| Genitourinary                     | 63.4 (62.2-64.5)                                    |
| Colon                             | 62.9 (61.8-64.0)                                    |
| Other cancer or >1 cancer subtype | 61.6 (61.0-62.1)                                    |
| No identified type                | 63.1 (60.8-65.5)                                    |

<sup>a</sup> Adjusted short-term mortality is expressed as percent
